# Supplementary material for: Local Geomorphological Gradients and Land Use Patterns Play Key Role on the Soil Bacterial Community Diversity and Dynamics in the Highly Endemic Indigenous Afrotemperate Coastal Scarp Forest Biome
Source: PubMed Central journal article supplement (PMC7943610; doi:10.3389/fmicb.2021.592725), 2021-02-24
Supplement: Data_Sheet_2.pdf [file Data_Sheet_2.pdf]

## *Supplementary Figures*

**Supplementary Figure 1.** Rarefaction curve and rank abundance plots

**Supplementary Figure 2.** Relative abundance of the top 15 classes. Heatmap was generated by ampvis2 package in R computing environment version 3.5.2.

**Supplementary Figure 3.** Venn diagram of unique and shared bacterial OTUs (at the 3% evolutionary distance) within the 3 topography types and between forest and sugarcane farm.

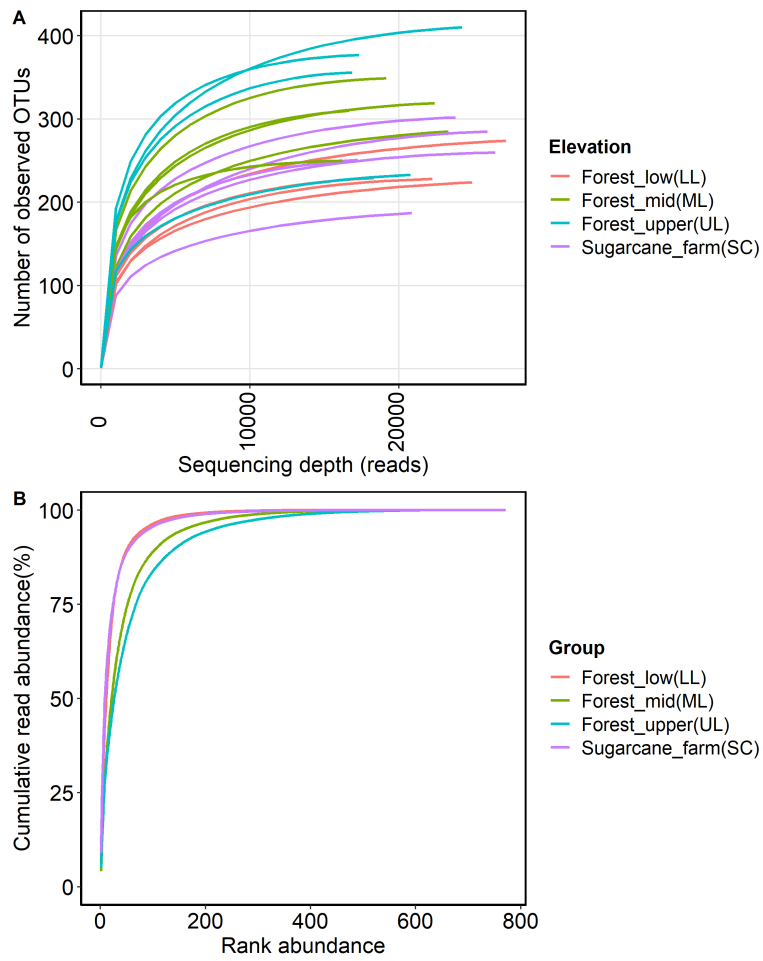

**Supplementary Figure 1.** Rarefaction curve and rank abundance plots

|                                      |                 |                  |                    |                     |
|--------------------------------------|-----------------|------------------|--------------------|---------------------|
| Proteobacteria; Alphaproteobacteria- | 26.7            | 27.9             | 25.7               | 20.6                |
| Actinobacteria; Thermoleophilia-     | 15.7            | 17.6             | 11.2               | 9.4                 |
| Actinobacteria; Actinobacteria-      | 15.5            | 10.1             | 5.8                | 8.9                 |
| Planctomycetes; Planctomycetacia-    | 6.3             | 9.5              | 11.1               | 5.4                 |
| Acidobacteria; Acidobacteria-        | 8.7             | 9.4              | 5.2                | 6.3                 |
| Proteobacteria; Betaproteobacteria-  | 4               | 3.2              | 4.2                | 13.7                |
| Proteobacteria; Gammaproteobacteria- | 3.8             | 3.7              | 8.6                | 8.9                 |
| Firmicutes; Bacilli-                 | 2.7             | 4.7              | 7.4                | 7.8                 |
| Actinobacteria; Acidimicrobiia-      | 4.1             | 4                | 2.8                | 2                   |
| Proteobacteria; Deltaproteobacteria- | 1.5             | 1                | 2                  | 1.8                 |
| Bacteroidetes; Sphingobacteriia-     | 0.6             | 0.3              | 0.4                | 3.7                 |
| Acidobacteria; Subgroup_6-           | 1.2             | 1.5              | 2.4                | 0.6                 |
| Acidobacteria; Subgroup_2-           | 1.4             | 1.3              | 1.9                | 1                   |
| Proteobacteria; Proteobacteria_unc-  | 1.3             | 1.2              | 1.2                | 0.8                 |
| Chloroflexi; JG37-AG-4-              | 0.8             | 0.2              | 2                  | 1                   |
|                                      | Forest_low(LL)- | Forest_mid (ML)- | Forest_upper (UL)- | Sugarcane_farm(SC)- |

**Supplementary Figure 2.** Relative abundance of the top 15 classes. Heatmap was generated by *ampvis2* package in R computing environment version 3.5.2.

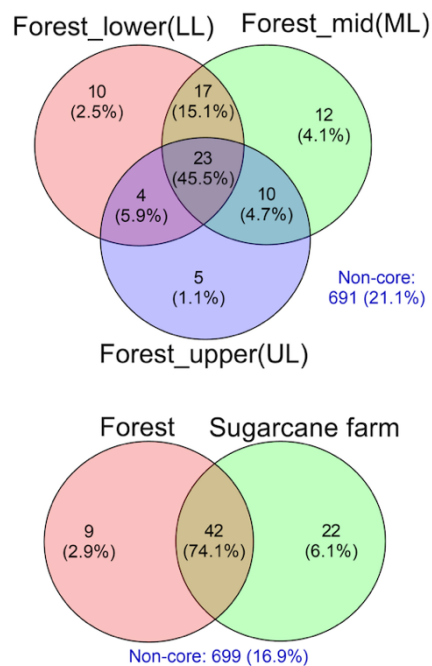

**Supplementary Figure 3.** Venn diagram of unique and shared bacterial OTUs (at the 3% evolutionary distance) within the 3 topography types and between forest and sugarcane farm.
